# Supplementary material
Source: PubMed Central journal article supplement (PMC5210253)
Supplement: 2016_154013-Disclosures_and_Contributions.pdf [file 2016_154013-Disclosures_and_Contributions.pdf]

Haematologica  
HAEMATOL/2016/154013  
Version 3

CK2 inhibitor CX-4945 destabilizes NOTCH1 and synergizes with JQ1  
against human T-acute lymphoblastic leukemic cells

Haiwei Lian, Dun Li, Yun Zhou, Esther Landesman-Bollag, Guanglan  
Zhang, Nicole M. Anderson, Kevin Charles Tang, Justine E. Roderick,  
Michelle A. Kelliher, David C. Seldin, Hui Fu, and Hui Feng

Disclosures: The authors declare no conflicts of interest. This study was supported by 4R00CA134743 and 1UL1TR001430 from the National Institutes of Health, a Ralph Edwards Career Development Professorship from Boston University, a young investigator grant from the Leukemia Research Foundation and a scholar grant from the St. Baldrick Foundation to H. Feng; an international scholar grant from the St. Baldrick Foundation to H.W.L; a postdoctoral fellowship grant from the Rally Foundation and a young investigator grant from the Alex Lemonade Stand to N.M.A; NSFC 81371338 from the National Science Foundation of China and Wuhan University Intramural Funding to H. Fu. D.L. acknowledges training support through NHLB1 T32 HL7501 from the National Institutes of Health.

Contributions: H.W.L, D.L, Y.Z, E.L, G.L.Z and N.M.A designed and performed the experiments. H.W.L, K.C.T and H. Feng. wrote the manuscript. H. Feng, H. Fu and D.C.S supervised the research. J.E.R. and M.A.K provided patient samples from murine xenografts.
